# Supplementary material for: Serial disparity in the carnivoran backbone unveils a complex adaptive role in metameric evolution
Source: Commun Biol. 2021 Jul 15;4:863. doi: 10.1038/s42003-021-02346-0 (PMC8282787; doi:10.1038/s42003-021-02346-0)
Supplement: Supplementary file 3 — Supplementary Data 1 [file 42003_2021_2346_MOESM3_ESM.xlsx]

## Sheet: Hoja1
Species	Family	Locomotion_legacy	Terrestrial	Cursorial	Arboreal	Aquatic	Fossorial
Acinonyx jubatus	Felidae	Cursorial	Yes	Yes	No	No	No
(NN;UVA)
Ailuropoda melanoleuca	Ursidae	Terrestrial	Yes	No	No	No	No
(Z.1986.19; NMS)
Ailurus fulgens	Ailuridae	Arboreal	No	No	Yes	No	No
(1802;UVA)
Aonyx cinerea	Mustelidae	Semi-aquatic	Yes	No	No	Yes	No
(2908;UVA)
Arctictis binturong	Viverridae	Arboreal	No	No	Yes	No	No
(5474;UVA)
Atilax paludinosus	Herpestidae	Semi-aquatic	Yes	No	No	Yes	No
(3253;UVA)
Canis lupus	Canidae	Cursorial	Yes	Yes	No	No	No
(4589;UVA)
Caracal caracal	Felidae	Terrestrial	Yes	No	No	No	No
(1556;UVA)
Chrysocyon brachyurus	Canidae	Cursorial	Yes	Yes	No	No	No
(Z.2015.177;NMS)
Crocuta crocuta	Hyaenidae	Cursorial	Yes	Yes	No	No	No
(4215;UVA)
Cryptoprocta ferox	Eupleridae	Arboreal	No	No	Yes	No	No
(EA36.08; NMS)
Cuon alpinus	Canidae	Cursorial	Yes	Yes	No	No	No
(7106; UVA)
Cynictis penicillata	Herpestidae	Terrestrial	Yes	No	No	No	Yes
(6730;UVA)
Felis concolor	Felidae	Scansorial	Yes	No	Yes	No	No
(409;UVA)
Felis silvestris	Felidae	Scansorial	Yes	No	Yes	No	No
(NN;UVA)
Genetta genetta	Viverridae	Scansorial	Yes	No	Yes	No	No
(1488;UVA)
Genetta tigrina	Viverridae	Scansorial	Yes	No	Yes	No	No
(3824;UVA)
Herpestes ichneumon	Herpestidae	Terrestrial	Yes	No	No	No	Yes
(7344;UVA)
Hyena hyena	Hyaenidae	Cursorial	Yes	Yes	No	No	No
(2981;UVA)
Leptailurus serval	Felidae	Terrestrial	Yes	No	No	No	No
(6070;UVA)
Lutra lutra	Mustelidae	Semi-aquatic	Yes	No	No	Yes	No
(2981;UVA)
Lycaon pictus	Canidae	Cursorial	Yes	Yes	No	No	No
(1167;UVA)
Lynx canadiensis	Felidae	Terrestrial	Yes	No	No	No	No
(Z.2001.117.9;UVA)
Martes foina	Mustelidae	Scansorial	Yes	No	Yes	No	No
(7342;UVA)
Meles meles	Mustelidae	Semi-fossorial	Yes	No	No	No	Yes
(NN;UVA)
Mustela putorius	Mustelidae	Terrestrial	Yes	No	No	No	No
(7203 and 7343; UVA)
Mustela vison		Semi-aquatic	Yes	No	No	Yes	No
(147;UVA)	Mustelidae
Nasua narica	Procyonidae	Scansorial	Yes	No	Yes	No	No
(5542;UVA)
Neofelis nebulosa	Felidae	Arboreal	Yes	No	Yes	No	No
(Z.2001.8;NMS)
Otaria byronia	Otaridae	Aquatic	No	No	No	Yes	No
(Z.2004.179.1;NMS)
Panthera leo	Felidae	Terrestrial	Yes	No	No	No	No
(NN;UVA)
Panthera pardus	Felidae	Scansorial	Yes	No	Yes	No	No
(1600;UVA)
Panthera tigris	Felidae	Terrestrial	Yes	No	No	No	No
(21574;MNCN)
Paradoxurus hermaphroditus	Viverridae	Arboreal	No	No	Yes	No	No
(4610;UVA)
Phoca vitulina	Phocidae	Aquatic	No	No	No	Yes	No
(M/180/02;NMS)
Potos flavus	Procyonidae	Arboreal	No	No	Yes	No	No
(124;UVA)
Procyon lotor	Procyonidae	Scansorial	Yes	No	Yes	No	No
(4264;UVA)
Proteles cristatus	Hyaenidae	Terrestrial	Yes	No	No	No	No
(PH37.98;NMS)
Speothos venaticus	Canidae	Semi-aquatic	Yes	No	No	Yes	No
(Z.2015.96.4;NMS)
Suricatta suricatta	Herpestidae	Semi-fossorial	Yes	No	No	No	Yes
(3098 and 7103; UVA)
Tremarctos ornatus	Ursidae	Scansorial	Yes	No	Yes	No	No
(Z.2008.34;NMS)
Ursus arctos	Ursidae	Terrestrial	Yes	No	No	No	No
(Z.2003.41.1;NMS)
Ursus maritimus	Ursidae	Semi-aquatic	Yes	No	No	Yes	No
(21570;MNCN)
Vulpes vulpes	Canidae	Cursorial	Yes	Yes	No	No	No
(150;UVA)
