# Supplementary material for: Serial disparity in the carnivoran backbone unveils a complex adaptive role in metameric evolution
Source: Commun Biol. 2021 Jul 15;4:863. doi: 10.1038/s42003-021-02346-0 (PMC8282787; doi:10.1038/s42003-021-02346-0)
Supplement: Supplementary file 4 — Supplementary Data 2 [file 42003_2021_2346_MOESM4_ESM.xlsx]

## Sheet: Hoja1
		Df	SS	MS	Rsq	F	Z	Pr(>F)
C03	fossorial	1	0.0018	0.0018	0.0329	0.7493	-0.2919	0.619
	Residuals	22	0.0537	0.0024	0.9671
	Total	23	0.0556
C04	arboreal	1	0.0031	0.0031	0.0551	1.2829	0.7114	0.239
	Residuals	22	0.0525	0.0024	0.9449
	Total	23	0.0556
C05	aquatic	1	0.0063	0.0063	0.1128	2.7983	1.9758	0.007
	Residuals	22	0.0493	0.0022	0.8872
	Total	23	0.0556
C06	aquatic	1	0.0063	0.0063	0.1132	2.874	1.8349	0.01
	terrestrial	1	0.0033	0.0033	0.06	1.5236	0.9423	0.181
	Residuals	21	0.046	0.0022	0.8271
	Total	23	0.0556
C07	aquatic	1	0.0064	0.0064	0.1153	2.8699	1.9825	0.013
	cursorial	1	0.0024	0.0024	0.0434	1.0808	0.384	0.372
	Residuals	21	0.0469	0.0022	0.8437
	Total	23	0.0556
T01	aquatic	1	0.0063	0.0063	0.1127	2.7708	1.8355	0.008
	fossorial	1	0.0018	0.0018	0.0328	0.8067	-0.1691	0.578
	Residuals	21	0.0475	0.0023	0.8543
	Total	23	0.0556
T02	aquatic	1	0.0063	0.0063	0.1128	2.8457	2.0476	0.009
	arboreal	1	0.0031	0.0031	0.055	1.3885	0.8369	0.205
	Residuals	21	0.0462	0.0022	0.8321
	Total	23	0.0556
T03	terrestrial	1	0.0033	0.0033	0.0593	1.3846	0.7744	0.235
	cursorial	1	0.0023	0.0023	0.0406	0.9484	0.136	0.445
	Residuals	21	0.05	0.0024	0.8997
	Total	23	0.0556
T04	terrestrial	1	0.0022	0.0022	0.0394	0.8924	0.0707	0.479
	fossorial	1	0.0007	0.0007	0.0127	0.2876	-1.8728	0.967
	Residuals	21	0.0516	0.0025	0.9276
	Total	23	0.0556
T05	terrestrial	1	0.0032	0.0032	0.0568	1.3442	0.7774	0.215
	arboreal	1	0.0029	0.0029	0.0523	1.2367	0.646	0.274
	Residuals	21	0.0494	0.0024	0.8881
	Total	23	0.0556
T06	cursorial	1	0.0023	0.0023	0.041	0.9303	0.1078	0.459
	fossorial	1	0.0018	0.0018	0.033	0.7484	-0.28	0.611
	Residuals	21	0.0515	0.0025	0.926
	Total	23	0.0556
T07	cursorial	1	0.0031	0.0031	0.0552	1.303	0.7188	0.231
	arboreal	1	0.0039	0.0039	0.0693	1.6368	1.152	0.129
	Residuals	21	0.0494	0.0024	0.8897
	Total	23	0.0556
T08	fossorial	1	0.0018	0.0018	0.0318	0.7312	-0.3247	0.623
	arboreal	1	0.003	0.003	0.054	1.2409	0.6367	0.278
	Residuals	21	0.0507	0.0024	0.9131
	Total	23	0.0556
T09	aquatic	1	0.0066	0.0066	0.1184	3.0296	1.9627	0.018
	terrestrial	1	0.0035	0.0035	0.0624	1.5967	1.0089	0.17
	cursorial	1	0.0025	0.0025	0.0458	1.1721	0.5102	0.345
	Residuals	20	0.0434	0.0022	0.7814
	Total	23	0.0556
T10	aquatic	1	0.0063	0.0063	0.1133	2.7824	1.7266	0.012
	terrestrial	1	0.0022	0.0022	0.04	0.9821	0.2076	0.42
	fossorial	1	0.0007	0.0007	0.0128	0.3143	-1.665	0.94
	Residuals	20	0.0453	0.0023	0.8143
	Total	23	0.0556
T11	aquatic	1	0.0063	0.0063	0.113	2.9169	1.8967	0.01
	terrestrial	1	0.0032	0.0032	0.0571	1.4739	0.9365	0.196
	arboreal	1	0.0029	0.0029	0.0521	1.3452	0.7739	0.229
	Residuals	20	0.0431	0.0022	0.775
	Total	23	0.0556
T12	aquatic	1	0.0063	0.0063	0.1142	2.8143	1.8525	0.019
	cursorial	1	0.0024	0.0024	0.0425	1.0478	0.334	0.387
	fossorial	1	0.0018	0.0018	0.0319	0.7866	-0.1937	0.585
	Residuals	20	0.0451	0.0023	0.8118
	Total	23	0.0556
T13	aquatic	1	0.0069	0.0069	0.1247	3.2604	2.2758	0.01
	cursorial	1	0.0037	0.0037	0.0671	1.7556	1.1841	0.12
	arboreal	1	0.0044	0.0044	0.0787	2.0588	1.5875	0.054
	Residuals	20	0.0425	0.0021	0.765
	Total	23	0.0556
T14	aquatic	1	0.0063	0.0063	0.1125	2.8117	1.8868	0.012
	fossorial	1	0.0018	0.0018	0.0316	0.7889	-0.2152	0.582
	arboreal	1	0.003	0.003	0.0538	1.3436	0.7638	0.229
	Residuals	20	0.0445	0.0022	0.8006
	Total	23	0.0556
L01	terrestrial	1	0.0022	0.0022	0.0388	0.8742	0.0335	0.492
	cursorial	1	0.0022	0.0022	0.0404	0.9103	0.0737	0.468
	fossorial	1	0.0007	0.0007	0.0125	0.2808	-1.9001	0.971
	Residuals	20	0.0493	0.0025	0.8873
	Total	23	0.0556
L02	terrestrial	1	0.0032	0.0032	0.0578	1.3893	0.8301	0.209
	cursorial	1	0.0031	0.0031	0.0561	1.3498	0.7567	0.225
	arboreal	1	0.0038	0.0038	0.0678	1.6302	1.133	0.135
	Residuals	20	0.0462	0.0023	0.8319
	Total	23	0.0556
L03	terrestrial	1	0.0022	0.0022	0.0389	0.8911	0.079	0.454
	fossorial	1	0.0008	0.0008	0.0139	0.3178	-1.737	0.954
	arboreal	1	0.003	0.003	0.0535	1.2237	0.6115	0.279
	Residuals	20	0.0486	0.0024	0.8742
	Total	23	0.0556
L04	cursorial	1	0.0032	0.0032	0.057	1.3317	0.7316	0.238
	fossorial	1	0.0019	0.0019	0.0336	0.7848	-0.1968	0.568
	arboreal	1	0.0039	0.0039	0.0699	1.6338	1.1179	0.135
	Residuals	20	0.0476	0.0024	0.8561
	Total	23	0.0556
L05	aquatic	1	0.0066	0.0066	0.119	2.9425	1.825	0.02
	terrestrial	1	0.0024	0.0024	0.0435	1.0766	0.3828	0.372
	cursorial	1	0.0026	0.0026	0.0461	1.1394	0.4686	0.358
	fossorial	1	0.0007	0.0007	0.0131	0.3235	-1.58	0.934
	Residuals	19	0.0427	0.0022	0.7683
L06	Total	23	0.0556
	aquatic	1	0.0067	0.0067	0.1203	3.2127	2.1599	0.015
	terrestrial	1	0.003	0.003	0.0534	1.4259	0.8788	0.206
	cursorial	1	0.0035	0.0035	0.0634	1.6938	1.0846	0.149
	arboreal	1	0.0039	0.0039	0.0698	1.8629	1.3644	0.084
	Residuals	19	0.0395	0.0021	0.7116
	Total	23	0.0556
L07	aquatic	1	0.0063	0.0063	0.1131	2.8234	1.782	0.015
	terrestrial	1	0.0022	0.0022	0.0395	0.9859	0.2245	0.406
	fossorial	1	0.0008	0.0008	0.014	0.3484	-1.5644	0.931
	arboreal	1	0.003	0.003	0.0533	1.3302	0.7396	0.238
	Residuals	19	0.0423	0.0022	0.7611
	Total	23	0.0556
L08	terrestrial	1	0.0021	0.0021	0.0386	0.8974	0.0902	0.447
	cursorial	1	0.0031	0.0031	0.0567	1.3171	0.7049	0.235
	fossorial	1	0.0008	0.0008	0.0144	0.3351	-1.6446	0.948
	arboreal	1	0.0039	0.0039	0.0698	1.6215	1.0901	0.145
	Residuals	19	0.0454	0.0024	0.8175
	Total	23	0.0556
L09	aquatic	1	0.0066	0.0066	0.1195	3.0829	2.1039	0.016
	cursorial	1	0.0036	0.0036	0.064	1.6502	1.0512	0.149
	fossorial	1	0.0016	0.0016	0.0284	0.7326	-0.3516	0.637
	arboreal	1	0.0042	0.0042	0.0752	1.9403	1.4084	0.083
	Residuals	19	0.0409	0.0022	0.7366
	Total	23	0.0556
Tfirst	aquatic	1	0.009472	0.0094715	0.15102	7.4711	3.635	0.002
	Residuals	42	0.053245	0.0012677	0.84898
	Total	43	0.062717
Tmid	aquatic	1	0.009443	0.0094432	0.16947	8.9406	3.9756	0.001
	terrestrial	1	0.002943	0.0029428	0.05281	2.7861	2.3362	0.009
	Residuals	41	0.043305	0.0010562	0.77718
	Total	43	0.055721
Diaph	aquatic	1	0.006042	0.0060416	0.07265	3.2904	2.0841	0.026
	Residuals	42	0.077116	0.0018361	0.92735
	Total	43	0.083158
Tlast	aquatic	1	0.009267	0.009267	0.12253	5.9981	3.2262	0.002
	fossorial	1	0.003739	0.0037391	0.04944	2.4202	1.9194	0.022
	Residuals	41	0.063345	0.001545	0.83757
	Total	43	0.075629
Lfirst	aquatic	1	0.008194	0.0081937	0.10861	5.3738	3.2461	0.004
	cursorial	1	0.002913	0.0029128	0.03861	1.9104	1.4856	0.066
	fossorial	1	0.003073	0.0030731	0.04073	2.0155	1.6432	0.046
	Residuals	40	0.06099	0.0015248	0.80842
	Total	43	0.075443
Lmid	aquatic	1	0.007143	0.0071425	0.08213	3.7579	2.5326	0.005
	Residuals	42	0.079827	0.0019006	0.91787
	Total	43	0.08697
Llast	aquatic	1	0.007332	0.0073317	0.05989	2.7527	1.9546	0.023
	fossorial	1	0.006318	0.0063182	0.05161	2.3722	1.7164	0.045
	Residuals	41	0.1092	0.0026634	0.89195
