# Supplementary material for: Serial disparity in the carnivoran backbone unveils a complex adaptive role in metameric evolution
Source: Commun Biol. 2021 Jul 15;4:863. doi: 10.1038/s42003-021-02346-0 (PMC8282787; doi:10.1038/s42003-021-02346-0)
Supplement: Supplementary file 5 — Supplementary Data 3 [file 42003_2021_2346_MOESM5_ESM.xlsx]

## Sheet: Hoja1
		Df	SS	MS	Rsq	F	Z	Pr(>F)
C03	cursorial	1	0.00372703	0.00372703	0.0560559	2.06114	1.80499	0.041
	arboreal	1	0.0034242	0.0034242	0.0515013	1.89367	1.70908	0.043
	Residuals	33	0.0596717	0.00180824	0.897486
	Total	35	0.0664876
C04	NS
C05	cursorial	1	0.00299037	0.00299037	0.0540876	2.0035	1.63	0.062
	fossorial	1	0.00328212	0.00328212	0.0593644	2.19897	1.88831	0.034
	arboreal	1	0.00267347	0.00267347	0.0483556	1.79118	1.53073	0.062
	Residuals	32	0.0477623	0.00149257	0.863888
	Total	35	0.0552876
C06	NS
C07	cursorial	1	0.00315223	0.00315223	0.0573634	2.06904	1.5432	0.074
	Residuals	34	0.0517997	0.00152352	0.942637
	Total	35	0.0549519
T01	cursorial	1	0.0024366	0.0024366	0.0577632	2.02304	1.82779	0.044
	Residuals	33	0.039746	0.00120443	0.942237
	Total	34	0.0421826
T02	terrestrial	1	0.00222893	0.00222893	0.0467822	1.67357	1.35456	0.089
	arboreal	1	0.00302968	0.00302968	0.0635888	2.27481	2.07744	0.02
	Residuals	32	0.0426188	0.00133184	0.894512
	Total	34	0.0476448
T03	NS
T04	terrestrial	1	0.00214468	0.00214468	0.0523989	1.82478	1.41324	0.077
	Residuals	33	0.0387852	0.00117531	0.947601
	Total	34	0.0409298
T05	NS
T06	terrestrial	1	0.00238624	0.00238624	0.0586215	2.05498	1.57013	0.06
	Residuals	33	0.0383196	0.0011612	0.941378
	Total	34	0.0407059
T07	terrestrial	1	0.00187995	0.00187995	0.0550255	1.92158	1.60021	0.051
	Residuals	33	0.0322852	0.000978338	0.944974
	Total	34	0.0341651
T08	NS
T09	fossorial	1	0.00203164	0.00203164	0.0611875	2.15079	2.04994	0.018
	Residuals	33	0.0311719	0.000944604	0.938812
	Total	34	0.0332036
T10	NS
T11	NS
T12	fossorial	1	0.00556918	0.00556918	0.0960773	3.50755	2.70856	0.008
	Residuals	33	0.0523964	0.00158777	0.903923
	Total	34	0.0579656
T13	fossorial	1	0.00388985	0.00388985	0.0651658	2.39588	1.92748	0.036
	arboreal	1	0.00277642	0.00277642	0.0465127	1.71008	1.30481	0.095
	Residuals	32	0.0519539	0.00162356	0.870373
	Total	34	0.0596916
T14	cursorial	1	0.00428523	0.00428523	0.14566	2.26193	1.39448	0.098
	fossorial	1	0.00468255	0.00468255	0.159166	2.47166	1.55348	0.072
	Residuals	11	0.0208395	0.0018945	0.708359
	Total	13	0.0294194
L01	cursorial	1	0.00491264	0.00491264	0.0869956	3.46014	2.71514	0.004
	fossorial	1	0.00318588	0.00318588	0.0564172	2.24392	1.88599	0.035
	arboreal	1	0.00260227	0.00260227	0.0460823	1.83287	1.68108	0.05
	Residuals	32	0.045433	0.00141978	0.804551
	Total	35	0.05647
L02	cursorial	1	0.00467523	0.00467523	0.0714403	2.68449	2.07129	0.027
	arboreal	1	0.00290723	0.00290723	0.0444243	1.66931	1.34513	0.096
	Residuals	33	0.0574719	0.00174157	0.878206
	Total	35	0.0654424
L03	cursorial	1	0.003838	0.003838	0.0647757	2.35492	1.85484	0.044
	Residuals	34	0.0554126	0.00162978	0.935224
	Total	35	0.0592506
L04	cursorial	1	0.00497616	0.00497616	0.0688215	2.51287	1.88129	0.033
	Residuals	34	0.0673292	0.00198027	0.931178
	Total	35	0.0723054
L05	cursorial	1	0.00393471	0.00393471	0.0620356	2.11644	1.53999	0.065
	Residuals	32	0.0594918	0.00185912	0.937964
	Total	33	0.0634265
L06	NS
L07	cursorial	1	0.00373189	0.00373189	0.07569	1.75556	1.31338	0.099
	arboreal	1	0.0043765	0.0043765	0.0887639	2.05879	1.61209	0.048
	Residuals	20	0.0425152	0.00212576	0.862291
	Total	22	0.0493049
Tfirst	cursorial	1	0.00278	0.0027805	0.07306	2.6798	2.1514	0.018
	Residuals	34	0.035278	0.0010376	0.92694
	Total	35	0.038058
Tmid	terrestrial	1	0.002354	0.0023543	0.06927	2.5304	2.1052	0.028
	Residuals	34	0.031634	0.0009304	0.93073
	Total	35	0.033989
Diaph	NS
Tlast	fossorial	1	0.002808	0.0028077	0.05162	1.8508	1.2935	0.094
	Residuals	34	0.051578	0.001517	0.94838
	Total	35	0.054386
Lfirst	cursorial	1	0.004411	0.0044112	0.09326	3.5897	2.7496	0.002
	fossorial	1	0.002501	0.0025015	0.05289	2.0356	1.7013	0.043
	Residuals	33	0.040552	0.0012288	0.85733
	Total	35	0.0473
Lmid	cursorial	1	0.003722	0.0037225	0.06612	2.4071	1.7825	0.034
	Residuals	34	0.052579	0.0015464	0.93388
	Total	35	0.056301
Llast	arboreal	1	0.004342	0.004342	0.05236	1.8784	1.4108	0.083
	Residuals	34	0.078591	0.0023115	0.94764
	Total	35	0.082932
